# Supplementary material for: A facile growth mechanism of wurtzite ZnS nanostructures showing intense ultraviolet luminescence
Source: Royal Society of Chemistry journal article supplement (doi:10.1039/c4ce00687a), 2014-05-31
Supplement: c4ce00687a1.pdf [file c4ce00687a1.pdf]

Electronic Supplementary Information (ESI)

**Facile-growth mechanism of wurtzite ZnS nanostructures showing  
intense ultraviolet luminescence**

Yeonho Kim and Du-Jeon Jang\*

Department of Chemistry, Seoul National University, Seoul 151-747, Republic of Korea

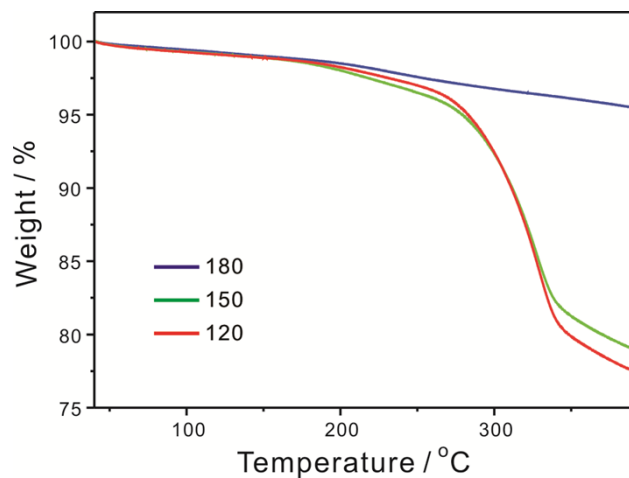

**Fig. S1** TGA curves of ZnS nanobelts grown for 6 h at reaction temperatures indicated in the units of °C.

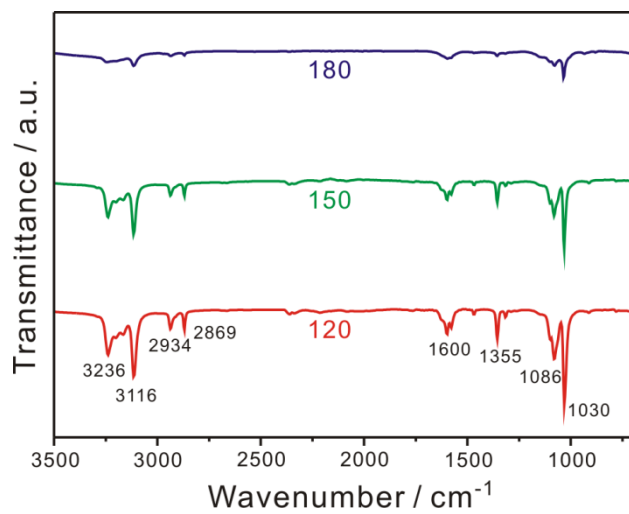

**Fig. S2** FTIR spectra of ZnS nanobelts grown for 6 h at reaction temperatures indicated in the units of °C.

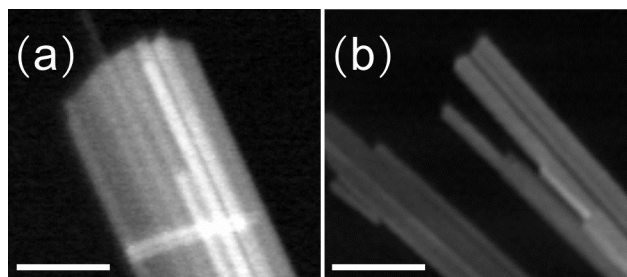

**Fig. S3** HAADF-STEM images of ZnS nanobelts grown at 180 °C for 6 (a) and 18 h (b), where each scale bar indicates 50 nm.

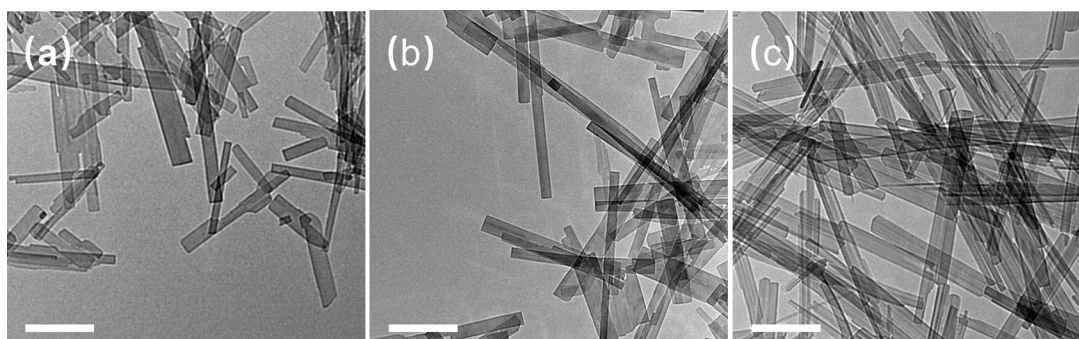

**Fig. S4** TEM images of ZnS nanobelts grown for 6 h at 120 (a), 150 (b), and 180 °C (c), where each scale bar indicates 200 nm.

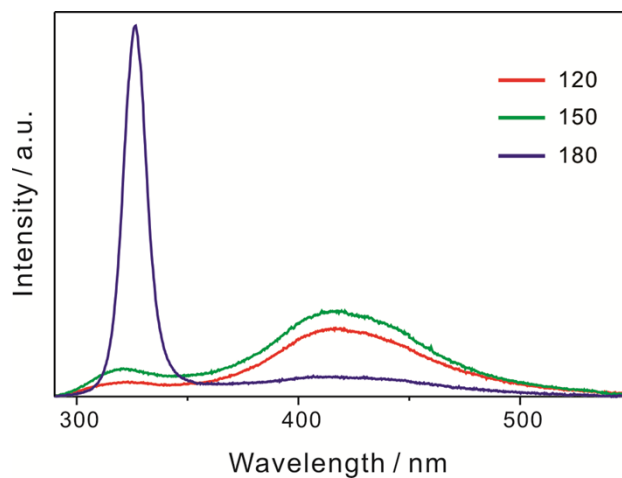

**Fig. S5** Photoluminescence spectra of ZnS nanobelts grown for 6 h at reaction temperatures indicated in the units of °C. The nanobelts were suspended in ethanol and excited with 266 nm laser pulses of 6 ns.
